# Supplementary material for: Modelling atmospheric dry deposition in urban areas using an urban canopy approach
Source: Copernicus journal article supplement (doi:10.5194/gmd-8-893-2015), 2015-03-31
Supplement: Supplementary file 1 [file gmd-8-893-2015-supplement.zip]

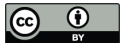

## *Supplement of*

# **Modelling atmospheric dry deposition in urban areas using an urban canopy approach**

**N. Cherin et al.**

*Correspondence to:* Y. Roustan ([roustan@cerea.enpc.fr](mailto:roustan@cerea.enpc.fr))

- [gmd-8-893-2015-supplement-cover-letter.pdf](#)
- Polyphemus-1.8.1
  - .gitignore
  - CREDITS
  - INSTALL
  - README
  - history
  - include
    - \* AtmoData
    - \* SeldonData
    - \* Talos
    - \* atmopy
    - \* common
    - \* driver
    - \* models
    - \* modules
    - \* newran
    - \* wgrib
  - license
  - postprocessing
    - \* disp.py
    - \* ensemble
    - \* evaluation.py
    - \* file\_bounds.dat
    - \* graph\_aerosol.py
    - \* init\_aerosol.py

- \* optics
- \* simulation.cfg
- \* simulation\_aerosol.cfg
- \* water\_plume
- preprocessing
  - \* bc
  - \* bio
  - \* dep
  - \* emissions
  - \* general.cfg
  - \* ground
  - \* ic
  - \* levels.dat
  - \* meteo
- processing
  - \* assimilation
  - \* castor
  - \* decay
  - \* gaussian
  - \* global
  - \* lagrangian-stochastic
  - \* local
  - \* nesting
  - \* photochemistry
  - \* plume-in-grid
  - \* radm
  - \* siream-aec
  - \* siream-sorgam
- utils
  - \* MM5\_var\_list.cpp
  - \* SConstruct
  - \* add\_float.cpp
  - \* add\_nb\_float.cpp
  - \* apply\_on\_files
  - \* call\_dates
  - \* check\_observation
  - \* cpp\_indent.lisp
  - \* double\_to\_float.cpp
  - \* ensemble\_generation
  - \* f77\_indent.lisp
  - \* float\_to\_text.cpp
  - \* format
  - \* get\_diff\_double.cpp
  - \* get\_diff\_float.cpp
  - \* get\_info\_MM5.cpp
  - \* get\_info\_double.cpp
  - \* get\_info\_float.cpp

- \* get\_partial\_diff\_double.cpp
- \* get\_partial\_diff\_float.cpp
- \* makefile
- \* mult\_nb\_float.cpp
- \* replace\_string
- \* reverse.cpp
- \* scons-local-1.3.1
- \* scons-time.py
- \* scons.py
- \* sconsign.py
- \* subtraction\_float.cpp
- \* text\_to\_float.cpp

– version

- dep.cfg
- dep.cpp
- libFlux.cxx
- libFlux.hxx
- libRa.cxx
- libRa.hxx
- libRa\_Louis.cxx
- libRa\_Louis.hxx
- libRs.cxx
- libRs.hxx
- luc.cfg
- makefile
